# Supplementary material for: Galactosylceramide Upregulates the Expression of the BCL2 Gene and Downregulates the Expression of TNFRSF1B and TNFRSF9 Genes, Acting as an Anti-Apoptotic Molecule in Breast Cancer Cells
Source: MDPI journal article supplement (doi:10.3390/cancers16020389), 2024-01-17
Supplement: s1 [file s1]

**Table S2. List of primers used in apoptosis gene expression profiling with a RT-qPCR array**

| GenBank   | Gen    | Description                                                                       | Type          | Primers  | Sequence 5'--3'       | bp  |
|-----------|--------|-----------------------------------------------------------------------------------|---------------|----------|-----------------------|-----|
| NM_000594 | TNF    | Tumor necrosis factor                                                             | Pro-Apoptotic | TNF-F    | ACTTTGGAGTGATCGGCCC   | 192 |
|           |        |                                                                                   |               | TNF-R    | CATTGGCCAGGAGGGCATT   |     |
| NM_003805 | CRADD  | CASP2 and RIPK1 domain containing adaptor with death domain                       |               | CRADD-F  | GTTGCAGTTTTTCTCCCCCG  | 121 |
|           |        |                                                                                   |               | CRADD-R  | CCCTCCACCAATACCTCTGC  |     |
| NM_003824 | FADD   | Fas (TNFRSF6)-associated via death domain                                         |               | FADD-F   | CTGGAGCAGAACGACCTGG   | 196 |
|           |        |                                                                                   |               | FADD-R   | GCCTTCTCCAATCTTTCCCCA |     |
| NM_005157 | ABL1   | C-abl oncogene 1, non-receptor tyrosine kinase                                    |               | ABL1-F   | TCCTCGTCTCCAGCTGTTA   | 152 |
|           |        |                                                                                   |               | ABL1-R   | GCAACGAAAAGGTTGGGGTC  |     |
| NM_000546 | p53    | Tumor protein p53                                                                 |               | p53-F    | CCAACAACACCAGCTCCTCT  | 118 |
|           |        |                                                                                   |               | p53-R    | AAGGCCTCATTCAGCTCTCG  |     |
| NM_001279 | CIDEA  | Cell death-inducing DFFA-like effector a                                          |               | CIDEA-F  | CTCATCAGGCCCCTGACATT  | 199 |
|           |        |                                                                                   |               | CIDEA-R  | GCACCAGAGTGACCAGTCC   |     |
| NM_003879 | CFLAR  | CASP8 and FADD-like apoptosis regulator                                           |               | CFLAR-F  | CGGGAGGAGGTGTAGGAGAG  | 186 |
|           |        |                                                                                   |               | CFLAR-R  | ATCCTTTCAGTGGGGGAGT   |     |
| NM_004938 | DAPK1  | Death-associated protein kinase 1                                                 |               | DAPK1-F  | GCAGGTCTCCTTGCAAGACT  | 160 |
|           |        |                                                                                   |               | DAPK1-R  | GCAGCCCACACTTGAGAGAT  |     |
| NM_004322 | BAD    | BCL2-associated agonist of cell death                                             |               | BAD-F    | TCCGGAGGATGAGTGACGAG  | 128 |
|           |        |                                                                                   |               | BAD-R    | ATCCCACCAGGACTGGAAGA  |     |
| NM_001188 | BAK1   | BCL2-antagonist/killer 1                                                          |               | BAK1-F   | GCAGGCTGATCCCGTCC     | 187 |
|           |        |                                                                                   |               | BAK1-R   | CCTTCAGCCTCCTGTTCTG   |     |
| NM_004324 | BAX    | BCL2-associated X protein                                                         |               | BAX-F    | CCCCCGAGAGGTCTTTTCC   | 160 |
|           |        |                                                                                   |               | BAX-R    | TGTCCAGCCCATGATGGTTC  |     |
| NM_001196 | BID    | BH3 interacting domain death agonist                                              |               | BID-F    | GAAGCGGGTAGTCGACCG    | 165 |
|           |        |                                                                                   |               | BID-R    | ACCGTTGTTGACCTCACAGT  |     |
| NM_001197 | BIK    | BCL2-interacting killer (apoptosis-inducing)                                      |               | BIK-F    | GGAGGTTCTTGGCATGACTGA | 133 |
|           |        |                                                                                   |               | BIK-R    | GCTCACGTCCATCTCGTCC   |     |
| NM_033292 | CASP1  | Caspase 1, apoptosis-related cysteine peptidase (interleukin 1, beta, convertase) |               | CASP1-F  | TCCGTTATTCGAAAGGGGC   | 191 |
|           |        |                                                                                   |               | CASP1-R  | ATAGCTGGGTTGTCCTGCAC  |     |
| NM_004346 | CASP3  | Caspase 3, apoptosis-related cysteine peptidase                                   |               | CASP3-F  | TGCATACTCCACAGCACCTG  | 154 |
|           |        |                                                                                   |               | CASP3-R  | TTCTGTTGCCACCTTTCGGT  |     |
| NM_001229 | CASP9  | Caspase 9, apoptosis-related cysteine peptidase                                   |               | CASP9-F  | AGGCCCCATATGATCGAGGA  | 193 |
|           |        |                                                                                   |               | CASP9-R  | TCGACAACCTTGCTGCTTGC  |     |
| NM_001252 | CD70   | CD70 molecule                                                                     |               | CD70-F   | GTCAGTTGGGTGGGACGTAG  | 146 |
|           |        |                                                                                   |               | CD70-R   | GATGGATACGTAGCTGCCCC  |     |
| NM_014430 | CIDEB  | Cell death-inducing DFFA-like effector b                                          |               | CIDEB-F  | GTCTTCCAGCTCAGCAGTGT  | 134 |
|           |        |                                                                                   |               | CIDEB-R  | AATCCCTGCTTTCCTGCCAA  |     |
| NM_019887 | DIABLO | Diablo, IAP-binding mitochondrial protein                                         |               | DIABLO-F | CGTGGCTATGGGGCGAG     | 189 |
|           |        |                                                                                   |               | DIABLO-R | AGCCACAACAGGAACACACA  |     |

|           |           |                                                        |                |             |                         |     |
|-----------|-----------|--------------------------------------------------------|----------------|-------------|-------------------------|-----|
| NM_000639 | FASLG     | Fas ligand (TNF superfamily, member 6)                 |                | FAS-F       | GTCTACCAGCCAGATGCACA    | 139 |
|           |           |                                                        |                | FAS-R       | CCATTCCAGAGGCATGGACC    |     |
| NM_000595 | LTA       | Lymphotoxin alpha (TNF superfamily, member 1)          |                | LTA-F       | TGCTTTGGACTACCGCCC      | 134 |
|           |           |                                                        |                | LTA-R       | GAAGAGACG TTCAGGTGGTGT  |     |
| NM_003844 | TNFRSF10A | Tumor necrosis factor receptor superfamily, member 10a |                | TNFRSF10A-F | CTACCTCCATGGGACAGCAC    | 162 |
|           |           |                                                        |                | TNFRSF10A-R | TTGCAGCTGAGCTAGGTACG    |     |
| NM_003842 | TNFRSF10B | Tumor necrosis factor receptor superfamily, member 10b |                | TNFRSF10B-F | GTGTCAGTGCGAAGAAGGCA    | 163 |
|           |           |                                                        |                | TNFRSF10B-R | TTCCCCACTGTGCTTTGTACC   |     |
| NM_002546 | TNFRSF11B | Tumor necrosis factor receptor superfamily, member 11b |                | TNFRSF11B-F | GCCTGGCACCAAAGTAAACG    | 200 |
|           |           |                                                        |                | TNFRSF11B-R | GCTCGAAGGTGAGGTTAGCA    |     |
| NM_001065 | TNFRSF1A  | Tumor necrosis factor receptor superfamily, member 1A  |                | TNFRSF1A-F  | CCTCAACTGTCACCCCAAGG    | 190 |
|           |           |                                                        |                | TNFRSF1A-R  | ATTCCCACCAACAGCTCCAG    |     |
| NM_001066 | TNFRSF1B  | Tumor necrosis factor receptor superfamily, member 1B  |                | TNFRSF1B-F  | CACATGCCGGCTCAGAGAAT    | 144 |
|           |           |                                                        |                | TNFRSF1B-R  | AGCTGGGTGTATGTGCTGTC    |     |
| NM_014452 | TNFRSF21  | Tumor necrosis factor receptor superfamily, member 21  |                | TNFRSF21 -F | GGGCTTCTTCGTGGATGAGT    | 199 |
|           |           |                                                        |                | TNFRSF21 -R | CCGCAGCTCCTCAGGATTTA    |     |
| NM_003790 | TNFRSF25  | Tumor necrosis factor receptor superfamily, member 25  |                | TNFRSF25-F  | CCACACACGGCTACTCTGTT    | 156 |
|           |           |                                                        |                | TNFRSF25-R  | AACATCTGCCTCCAGCCAC     |     |
| NM_001561 | TNFRSF9   | Tumor necrosis factor receptor superfamily, member 9   |                | TNFRSF9 -F  | CTCACGCTCCGTTTCTCTGT    | 121 |
|           |           |                                                        |                | TNFRSF9 -R  | GAAATCGGCAGCTACAGCCA    |     |
| NM_003810 | TNFSF10   | Tumor necrosis factor (ligand) superfamily, member 10  |                | TNFSF10-F   | TTGGGACCCCAATGACGAAG    | 197 |
|           |           |                                                        |                | TNFSF10-R   | TGGTCCCAGTTATGTGAGCTG   |     |
| NM_003789 | TRADD     | TNFRSF1A-associated via death domain                   |                | TRADD-F     | GAAGCGGCGGAGTAGAGC      | 139 |
|           |           |                                                        |                | TRADD-R     | AGCGAGGACTCCACAAACAG    |     |
| NM_021138 | TRAF2     | TNF receptor-associated factor 2                       |                | TRAF2-F     | TCCCCTTAACTTGTGACGGC    | 105 |
|           |           |                                                        |                | TRAF2-R     | CGTGGAATCTGCAAGGGACT    |     |
| NM_005163 | AKT1      | V-akt murine thymoma viral oncogene homolog 1          | Anti-Apoptotic | AKT1-F      | CAGGATGTGGACCAACGTGA    | 137 |
|           |           |                                                        |                | AKT1-R      | AAGGTGCGTTCGATGACAGT    |     |
| NM_004323 | BAG1      | BCL2-associated athanogene                             |                | BAG1-F      | ACCGTTGTCAGCACTTGGAA    | 198 |
|           |           |                                                        |                | BAG1-R      | GCTTGCAAATCCTTGGGCAG    |     |
| NM_003921 | BCL10     | B-cell CLL/lymphoma 10                                 |                | BCL10 -F    | GGTCTGGACACCCTTGTTGA    | 155 |
|           |           |                                                        |                | BCL10 -R    | GCTCCATCTGGAAAAGGTTAC   |     |
| NM_000633 | BCL2      | B-cell CLL/lymphoma 2                                  |                | BCL2-F      | CTTTGAGTTCGGTGGGGTCA    | 162 |
|           |           |                                                        |                | BCL2-R      | GGGCCGTACAGTTCCACAAA    |     |
| NM_004049 | BCL2A1    | BCL2-related protein A1                                |                | BCL2A1-F    | GATAAGGCAAAACGGAGGCTG   | 133 |
|           |           |                                                        |                | BCL2A1-R    | TGGTCAACAGTATTGCTTCAGGA |     |
| NM_016561 | BFAR      | Bifunctional apoptosis regulator                       |                | BFAR-F      | TTTAGCTCCTAACACAGGCCG   | 178 |
|           |           |                                                        |                | BFAR-R      | AACTTCTTCGCGCTCCATT     |     |
| NM_001242 | CD27      | CD27 molecule                                          |                | CD27-F      | TGCCAGATGTGTGAGCCAG     | 191 |
|           |           |                                                        |                | CD27-R      | TCAGCATTGGCAGTGATGGT    |     |

|           |       |                                                                      |           |                      |                       |     |
|-----------|-------|----------------------------------------------------------------------|-----------|----------------------|-----------------------|-----|
| NM_001250 | CD40  | CD40 molecule, TNF receptor superfamily member 5                     |           | CD40-F               | GGCAGGCACAAACAAGACTG  | 139 |
|           |       |                                                                      |           | Cd40-R               | TGGCTTCTTGGCCACCTTTT  |     |
| NM_000572 | IL10  | Interleukin 10                                                       |           | IL10-F               | GGGCACCCAGTCTGAGAAC   | 190 |
|           |       |                                                                      |           | IL10-R               | CTCAGACAAGGCTTGGCAAC  |     |
| NM_003946 | NOL3  | Nucleolar protein 3 (apoptosis repressor with CARD domain)           |           | NOL3-F               | TCTGGAGAGGCAGGAGGAC   | 137 |
|           |       |                                                                      |           | NOL3-R               | CTCGCGGTCGATAGTCTCTG  |     |
| NM_003998 | NFKB1 | Nuclear factor of kappa light polypeptide gene enhancer in B-cells 1 |           | NFKB1-F              | GCTTAGGAGGGAGAGCCCA   | 196 |
|           |       |                                                                      |           | NFKB1-R              | GGTATGGGCCATCTGCTGTT  |     |
| NM_004330 | BNIP2 | BCL2/adenovirus E1B 19kDa interacting protein 2                      |           | BNIP2-F              | CCTGCTTTTTCGACCTGG    | 103 |
|           |       |                                                                      |           | BNIP2-R              | AATCCAGGGAGCCAATGTCC  |     |
| NM_001165 | BIRC3 | Baculoviral IAP repeat containing 3                                  |           | BIRC3-F              | GCTTGCAAGTGCGGGTTTTTA | 185 |
|           |       |                                                                      |           | BIRC3-R              | TGGCTTGAACCTGACGGATGA |     |
| NM_004536 | NAIP  | NLR family, apoptosis inhibitory protein                             | NAIP-F    | ATTGGGGACTTCGTCTGGGA | 183                   |     |
|           |       |                                                                      | NAIP-R    | GGGTGGCCATTTTCTGAGGT |                       |     |
| NM_001101 | ACTB  | Actin, beta                                                          | Reference | ACTB-F               | AGAAAATCTGGCACCACACCT | 187 |
|           |       |                                                                      |           | ACTB-R               | GAGGCGTACAGGGATAGCAC  |     |
| NM_002046 | GAPDH | Glyceraldehyde-3-phosphate dehydrogenase                             |           | GAPDH-F              | GGAAGGTGAAGGTCGGAGTC  | 108 |
|           |       |                                                                      |           | GAPDH-R              | TGAAGGGGTCATTGATGGCA  |     |
