# Supplementary material for: Galactosylceramide Upregulates the Expression of the BCL2 Gene and Downregulates the Expression of TNFRSF1B and TNFRSF9 Genes, Acting as an Anti-Apoptotic Molecule in Breast Cancer Cells
Source: MDPI journal article supplement (doi:10.3390/cancers16020389), 2024-01-17
Supplement: s1 [file s1]

| primer                | species | application                                          | annealing temp. (°C) | primer sequence 5'-3'                                | primer length | reference              |
|-----------------------|---------|------------------------------------------------------|----------------------|------------------------------------------------------|---------------|------------------------|
| RT-forUGT8a           | mouse   | Real-time-PCR assay                                  | 55                   | CATGGTGTCCCTGTAGTGG                                  | 19            | This work              |
| RT-revUGT8a           |         |                                                      |                      | GAGCCCTCTGCCGATAAC                                   | 18            |                        |
| RT-forAKT-m           | mouse   |                                                      | 55                   | ACCACACCTTCTACAATGAGC                                | 21            | This work              |
| RT-revAKT-m           |         |                                                      |                      | GACAGCACAGCCTGGATGGC                                 | 20            |                        |
| RT-forUGT8            | human   |                                                      | 55                   | CATGGTGTGCCTGTAGTGG                                  | 19            | Owczarek et al., 2013  |
| RT-revUGT8            |         |                                                      |                      | GAGCCCTCTGACGGTAGC                                   | 18            |                        |
| RT-forAKT             | human   |                                                      | 55                   | ACCACACCTTCTACAATGAGC                                | 21            | Suchanski et al., 2017 |
| RT-revAKT             |         |                                                      |                      | GATAGCACAGCCTGGATAGC                                 | 20            |                        |
| RT-forTNFRSF1B        | human   |                                                      | 58                   | CACATGCCGGCTCAGAGAAT                                 | 20            | This work              |
| RT-revTNFRSF1B        |         |                                                      |                      | AGCTGGGTGTATGTGCTGTC                                 | 20            |                        |
| RT-forTNFRSF9         | human   |                                                      | 58                   | CTCACGCTCCGTTTCTCTGT                                 | 20            | This work              |
| RT-revTNFRSF9         |         |                                                      |                      | GAAATCGGCAGCTACAGCCA                                 | 20            |                        |
| RT-forBCL2            | human   |                                                      | 58                   | CTTTGAGTTCGGTGGGGTCA                                 | 20            | This work              |
| RT-revBCL2            |         |                                                      |                      | GGGCCGTACAGTTCACAAA                                  | 20            |                        |
| forMluI-P-Bcl2        | human   | Promotor insertion into pGL3-Basic luciferase vector | 55                   | CA <u>ACGCGT</u> GAGGGCTCTTTCTTTCTTCT<br>MluI        | 28            | This work              |
| revHindIII-P-Bcl2     |         |                                                      |                      | GAA <u>AAGCTT</u> AGCTGATTGAAACTTCCCA<br>HindIII     | 28            |                        |
| forMluI-P- TNFRSF9    | human   |                                                      | 55                   | CA <u>ACGCGT</u> CCTCCTTCCTCCCTCTGTC<br>Mlu I        | 27            | This work              |
| revHindIII-P-TNFRSF9  |         |                                                      |                      | GAA <u>AAGCTT</u> CCCCAGATGGACAGACCTT<br>HindIII     | 27            |                        |
| forMluI-P-TNFRSF1B    | human   |                                                      | 55                   | CA <u>ACGCGT</u> ATGGTGGCCCCGAGCCTGT<br>Mlu I        | 26            | This work              |
| revHindIII-P-TNFRSF1B |         |                                                      |                      | GAA <u>AAGCTT</u> TGGGCCGCGCGAGTCA<br>HindIII        | 24            |                        |
| forEcoRI-UGT8a        | mouse   | UGT8a-expressing vector construction                 | 52                   | <u>CGAATTC</u> ATGAAGTCTTACACTCC<br>EcoRI            | 24            | This work              |
| revMluI-UGT8a         |         |                                                      |                      | GA <u>ACGCGT</u> TCATCTCACCTTCTTTT<br>MluI           | 25            |                        |
| forXhoI-UGT8          | human   | UGT8-expressing vector construction                  | 52                   | <u>CCTCGAG</u> CGCCTCCATGAAGTCTTACACTCCATATT<br>XhoI | 29            | Suchanski et al., 2017 |
| revBamHI-UGT8         |         |                                                      |                      | G <u>CGGATCC</u> TCAATTCACCTTCTTTTCATGT<br>BamHI     | 22            |                        |
| F1-exon2/UGT8         | human   | Genome sequencing after CRISPR-Cas9 editing          | 55                   | GCCGCCAATTATGTTTGAAAGC                               | 22            | This work              |
| R1-exon2/UGT8         |         |                                                      |                      | GGCTGGACCCATGAACCAAA                                 | 20            |                        |
