# Supplementary material for: Galactosylceramide Upregulates the Expression of the BCL2 Gene and Downregulates the Expression of TNFRSF1B and TNFRSF9 Genes, Acting as an Anti-Apoptotic Molecule in Breast Cancer Cells
Source: Cancers (Basel). 2024 Jan 17;16(2):389. doi: 10.3390/cancers16020389 (PMC10813928; doi:10.3390/cancers16020389)
Supplement: Supplementary file 1 [file cancers-16-00389-s001.zip]

Archive with 12 entries (12 files):
- Caption for supplementary materials.pdf
- Fig S1.tif
- Fig S2.tif
- Fig S3.tif
- Fig S4.tif
- Fig S5.tif
- Fig S6.tif
- Fig S7.tif
- Fig S8.tif
- Figure S9.pdf
- Table S1.pdf
- Table S2.pdf
