# Supplementary figures and images for: Galactosylceramide Upregulates the Expression of the BCL2 Gene and Downregulates the Expression of TNFRSF1B and TNFRSF9 Genes, Acting as an Anti-Apoptotic Molecule in Breast Cancer Cells
Source: MDPI journal article supplement (doi:10.3390/cancers16020389), 2024-01-17

Fig 1

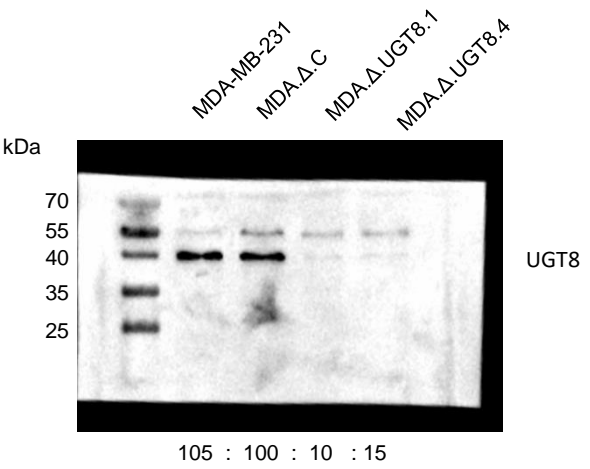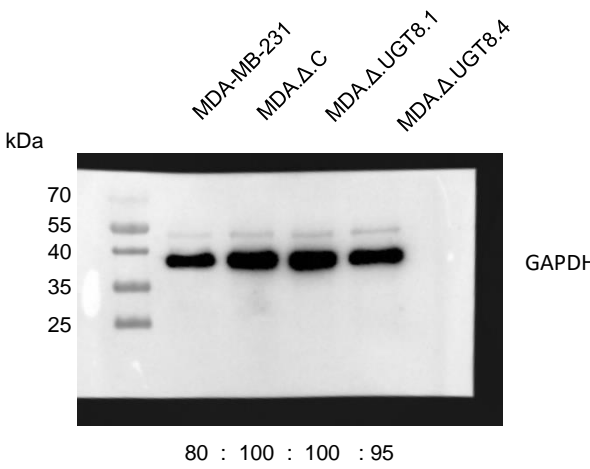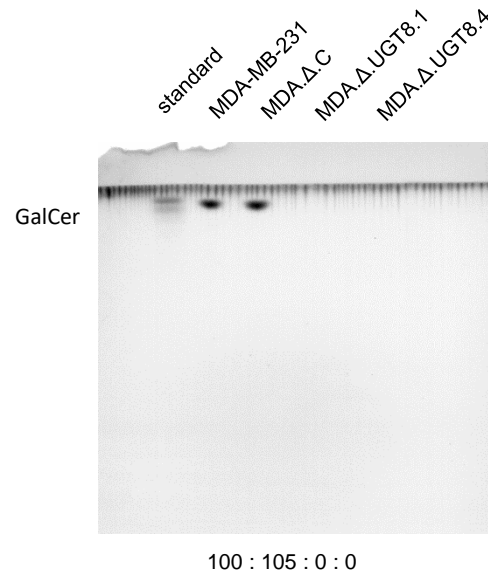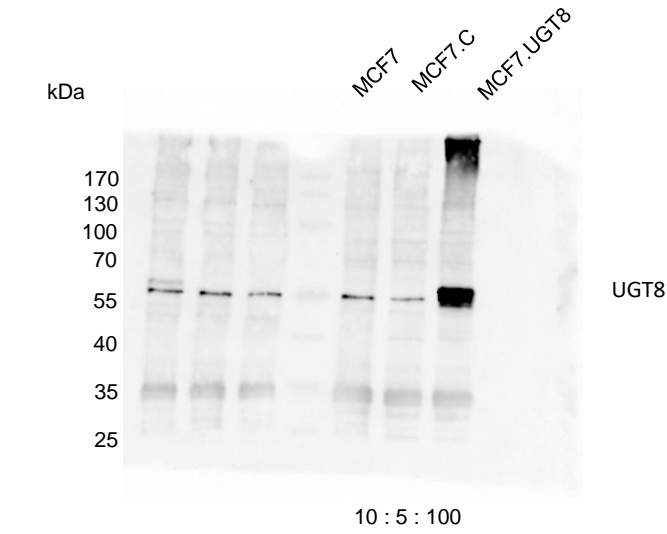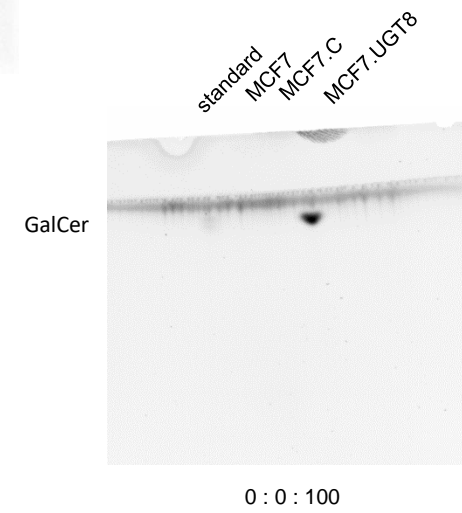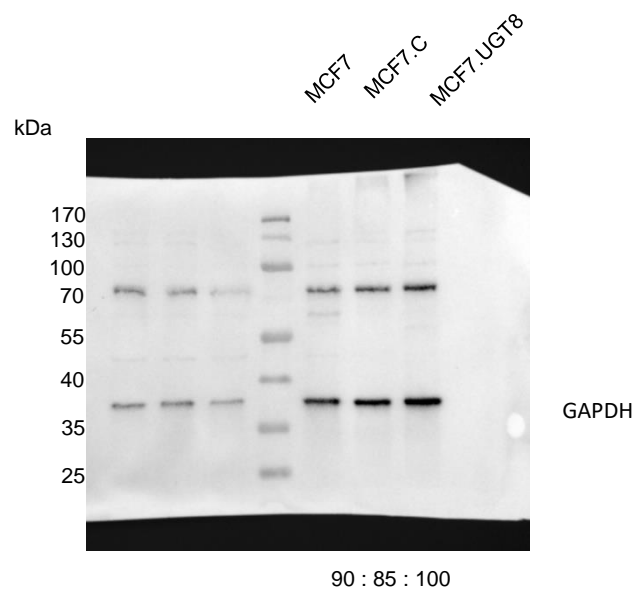

Fig 2

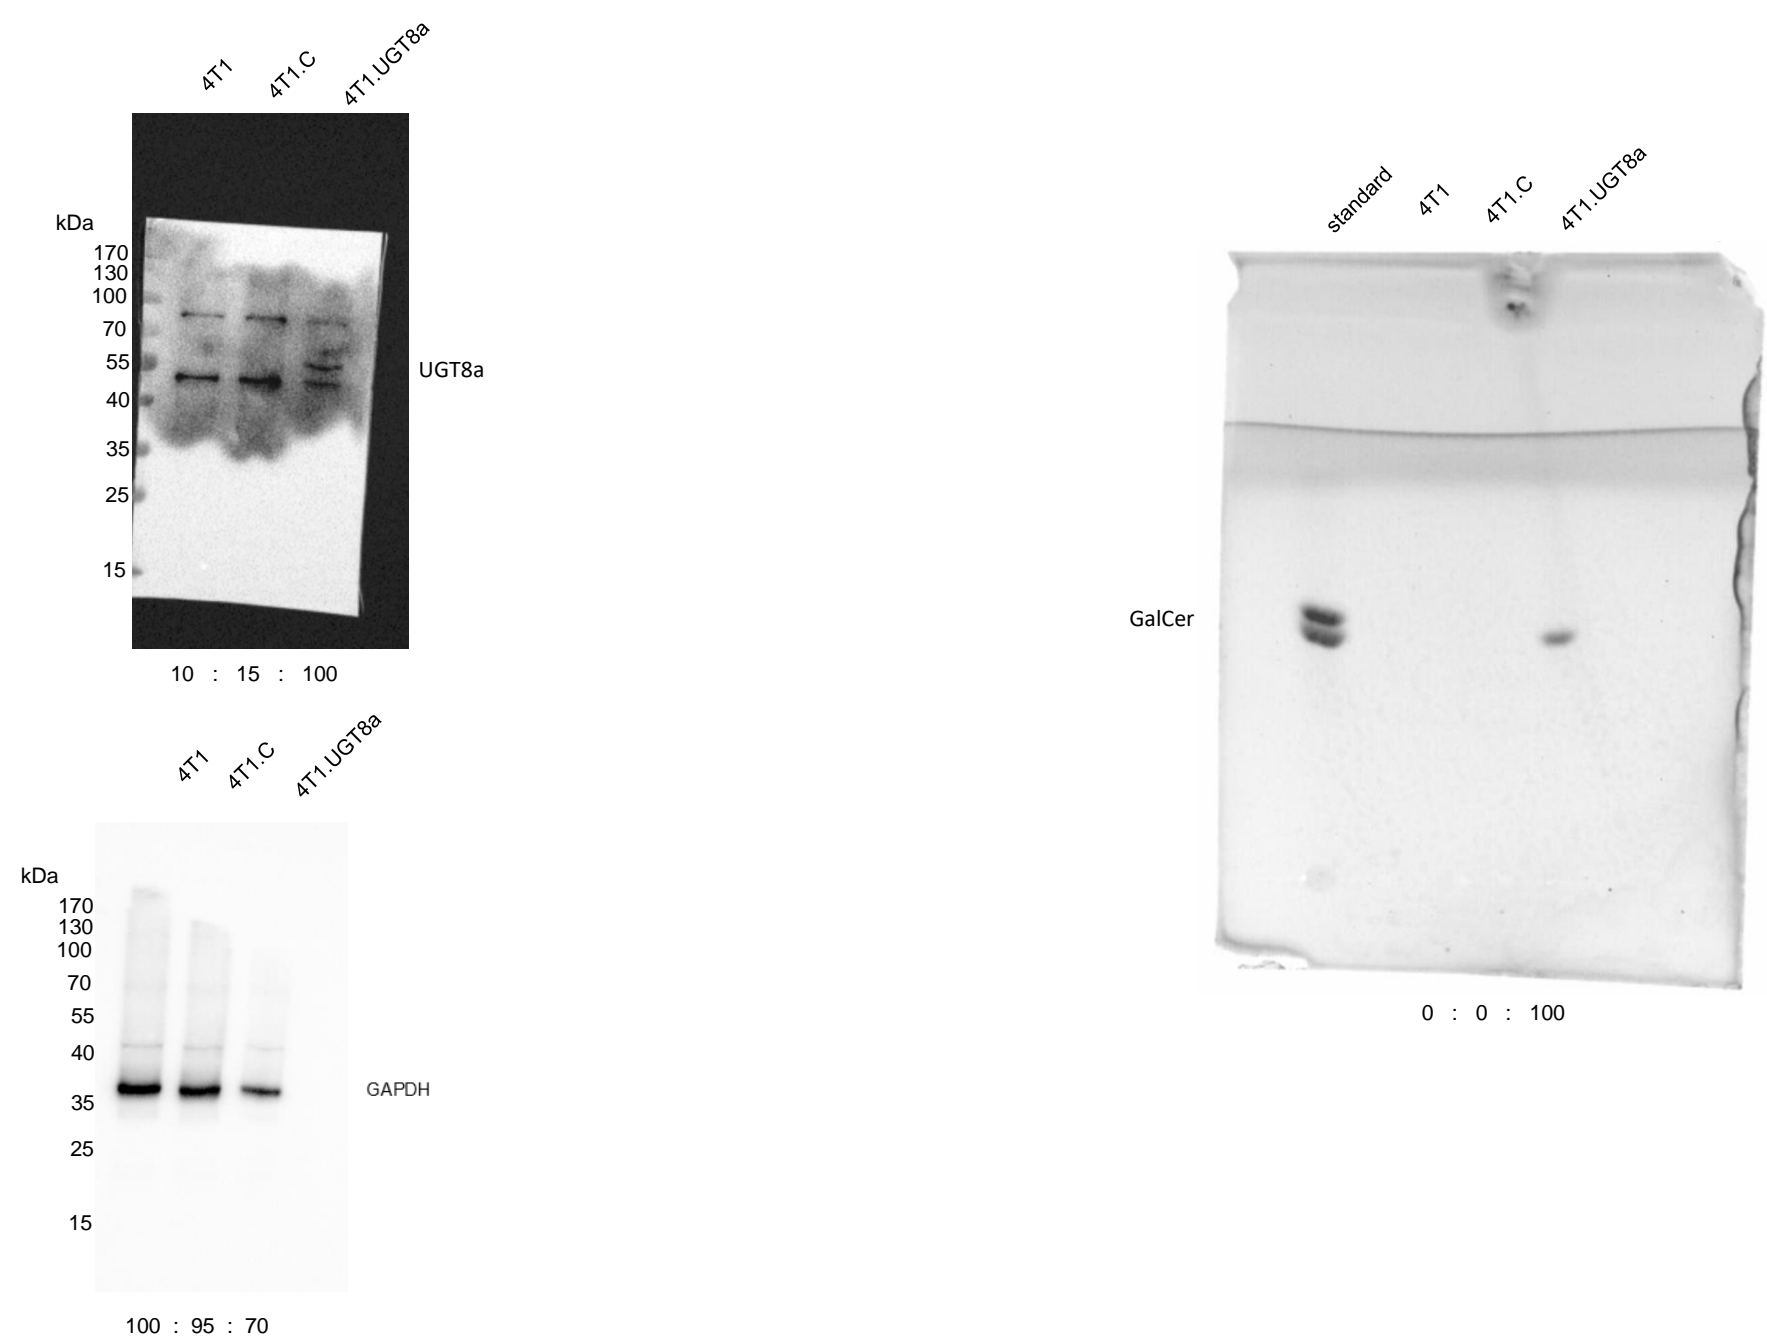

Fig 3B

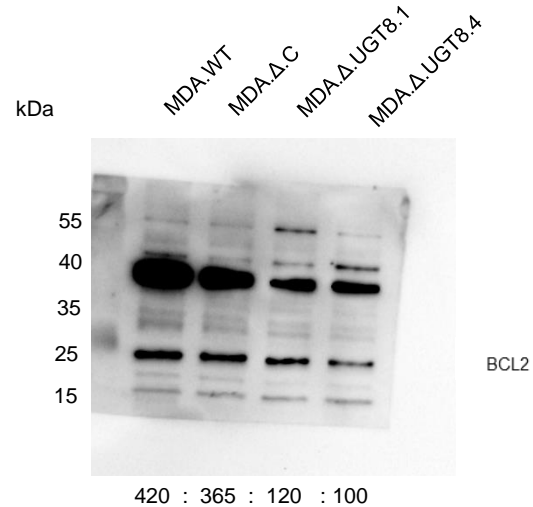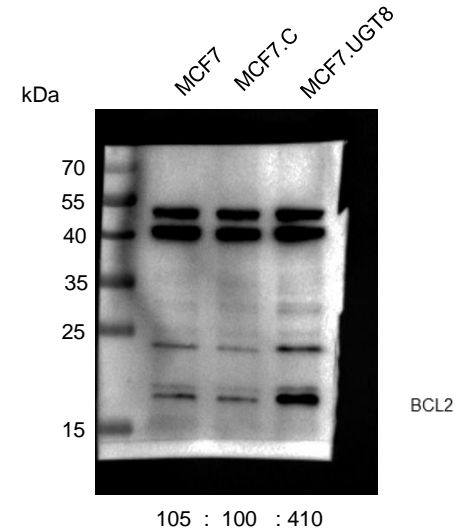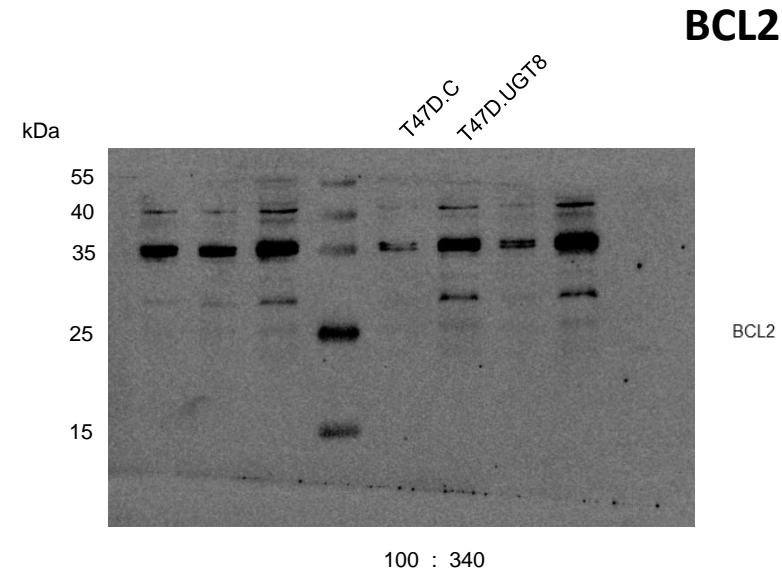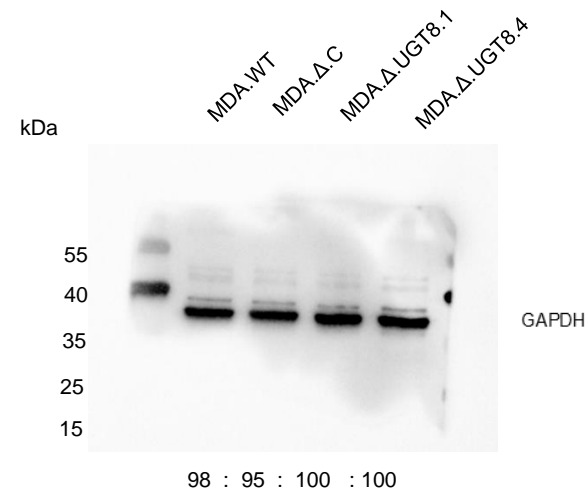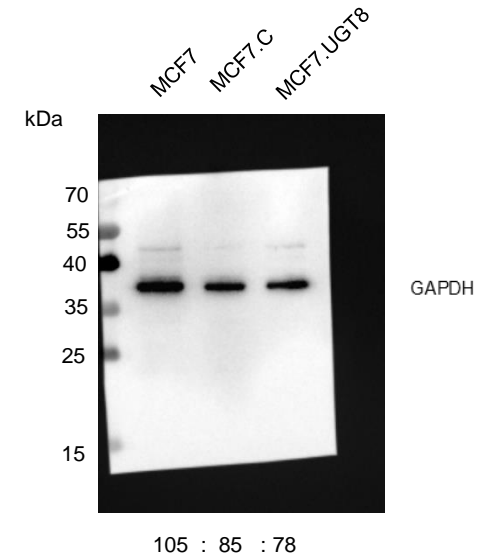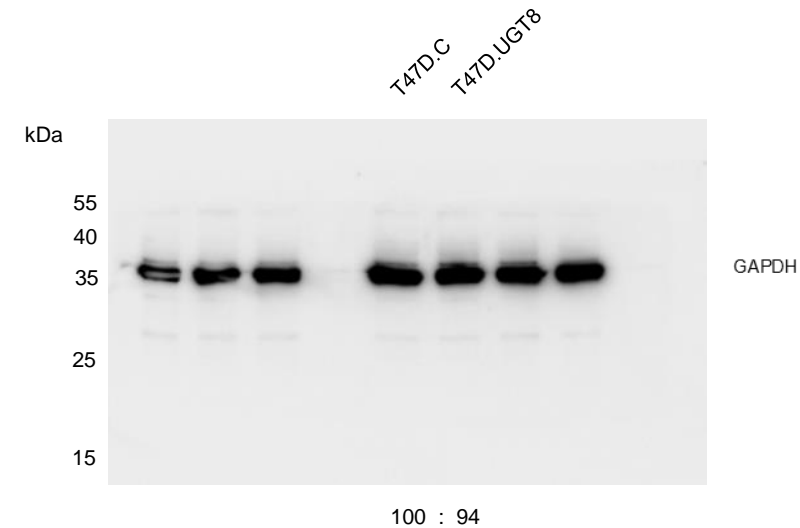

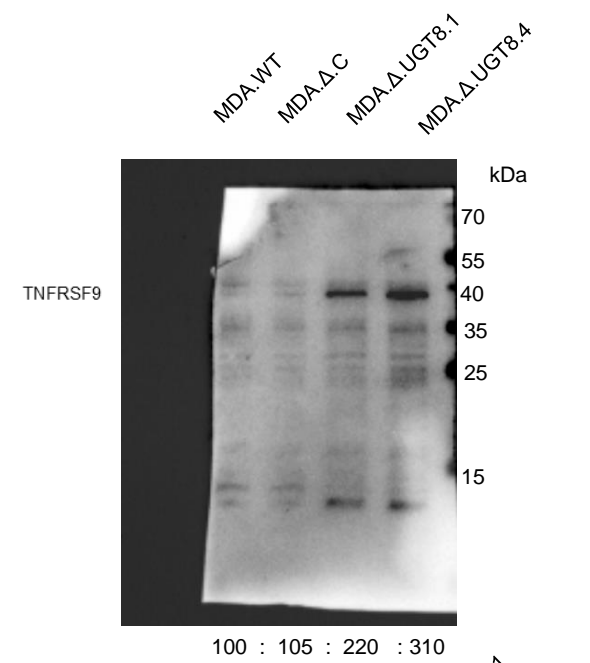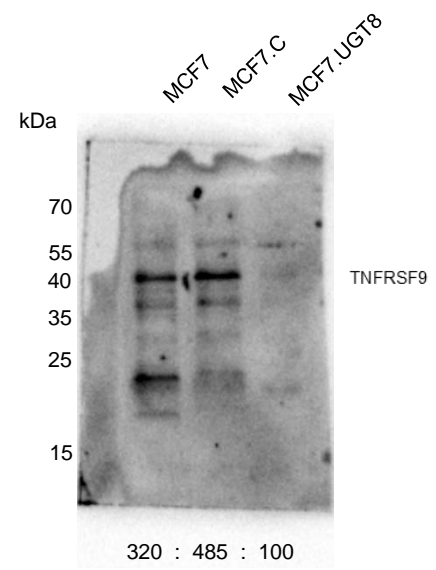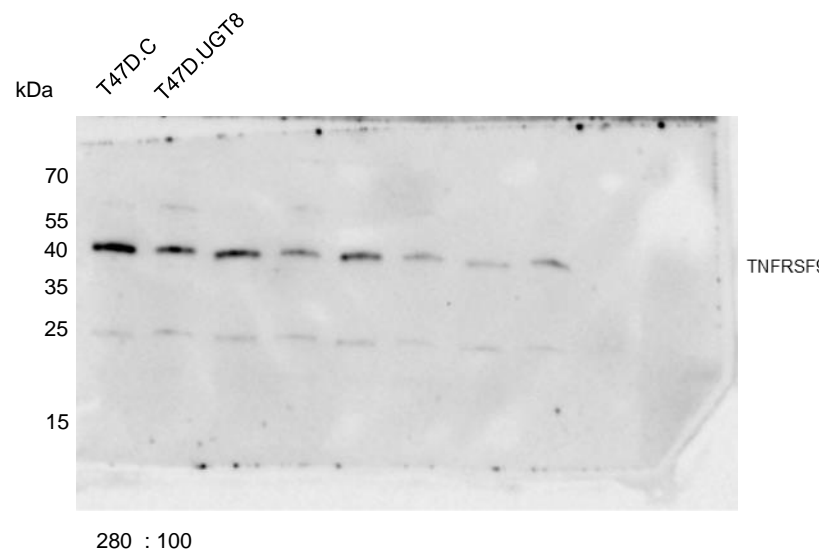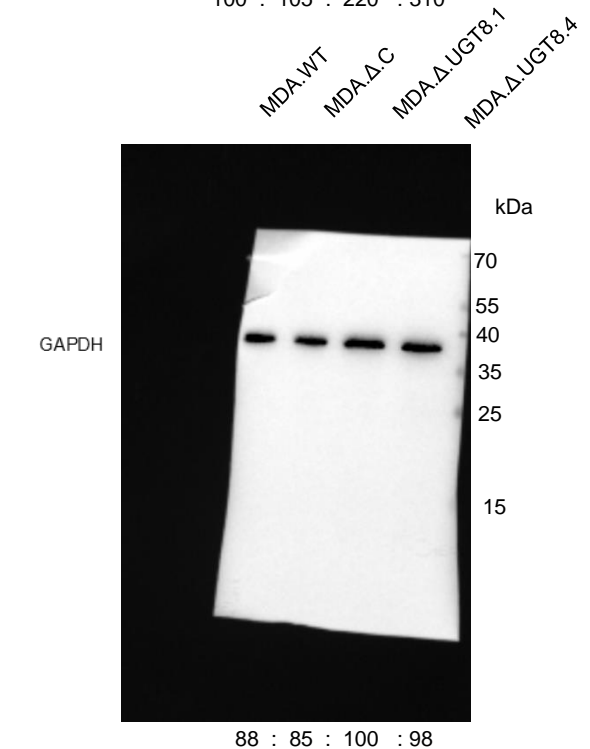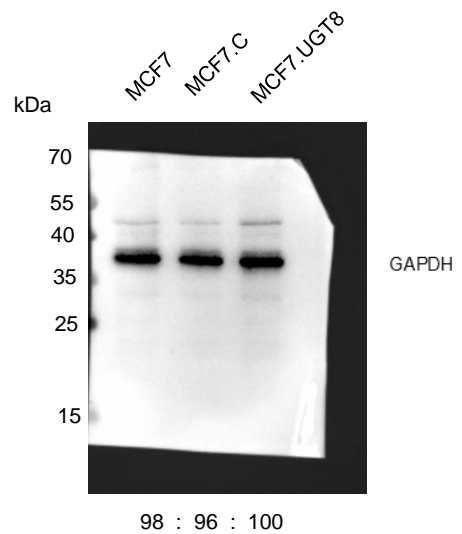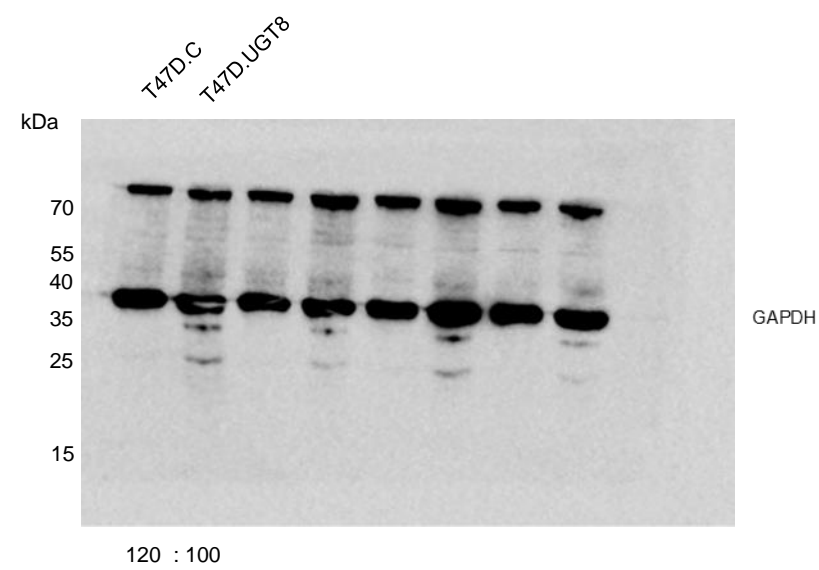

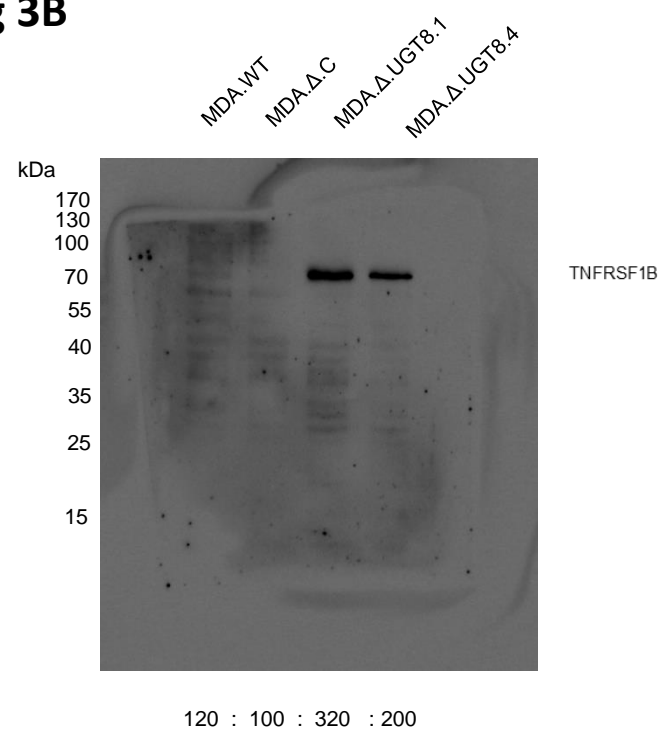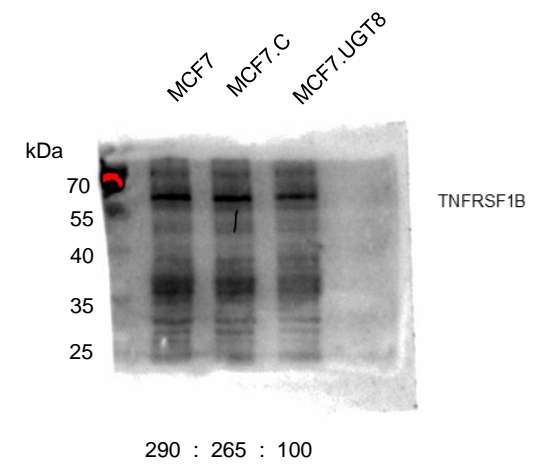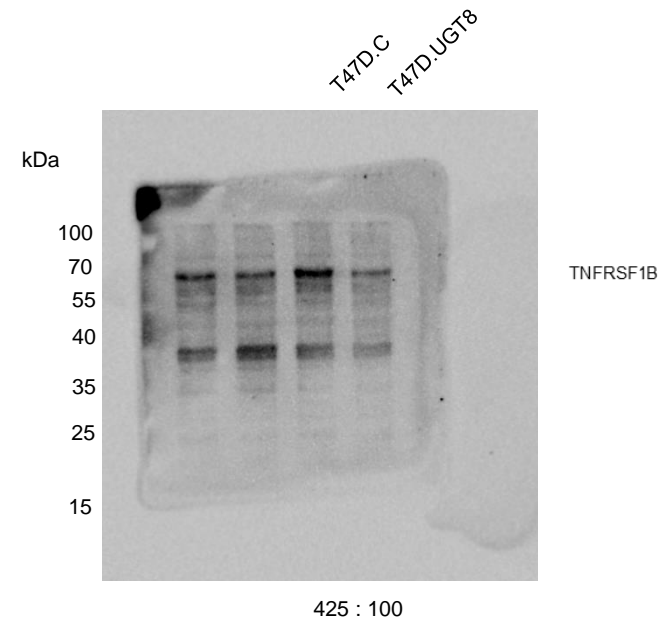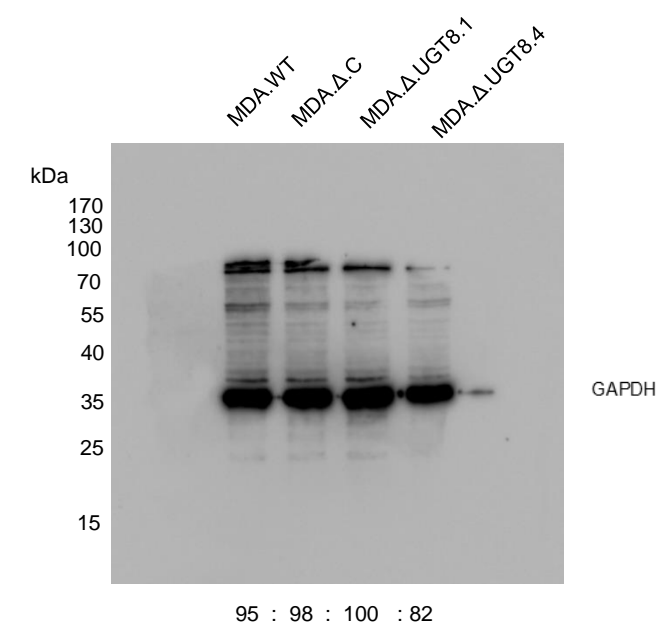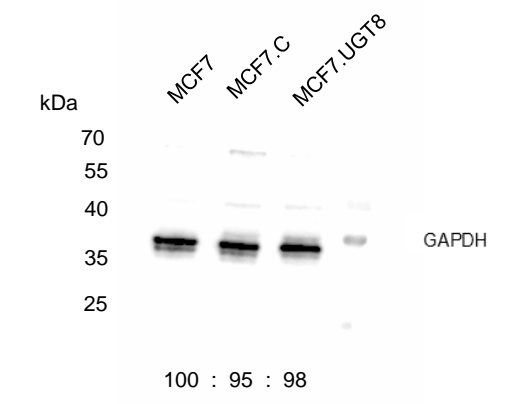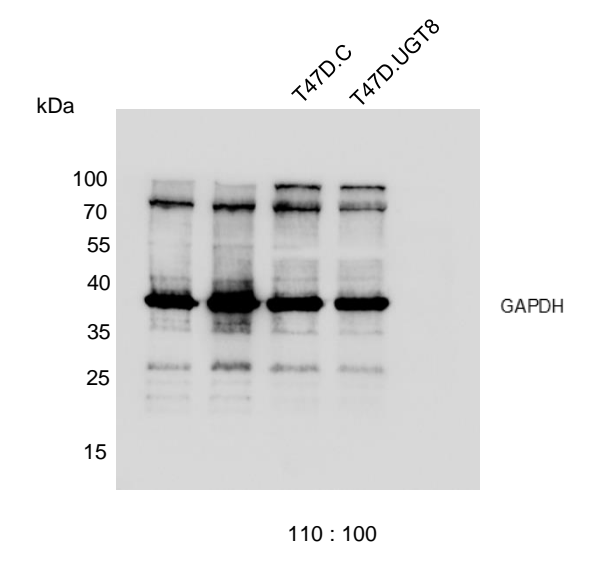

Fig 6A

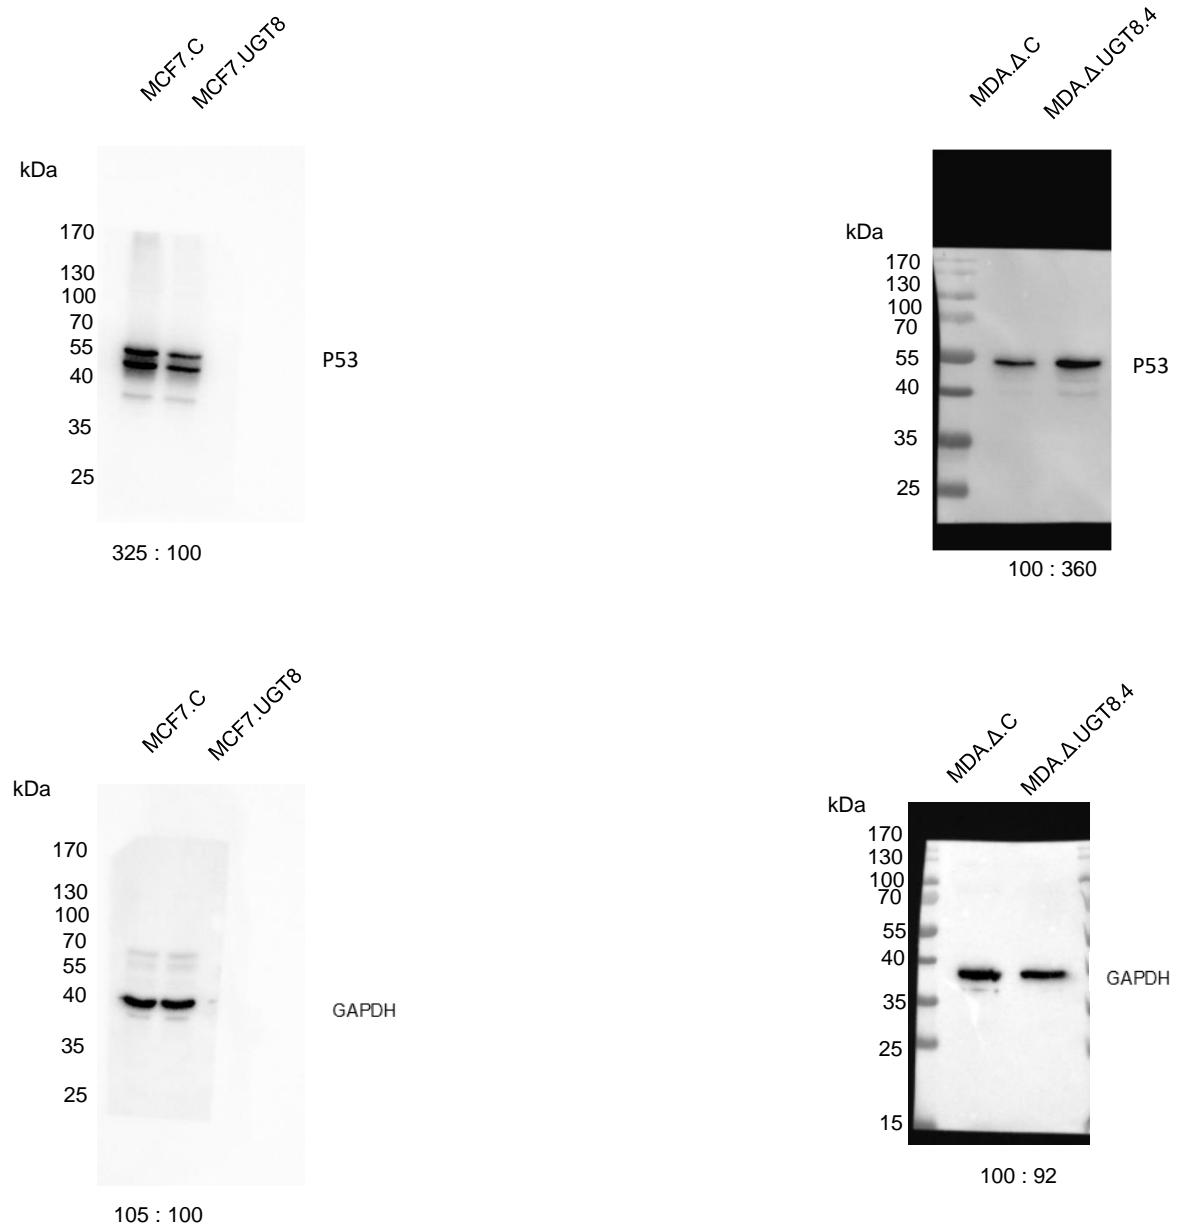

Sup. Fig S8

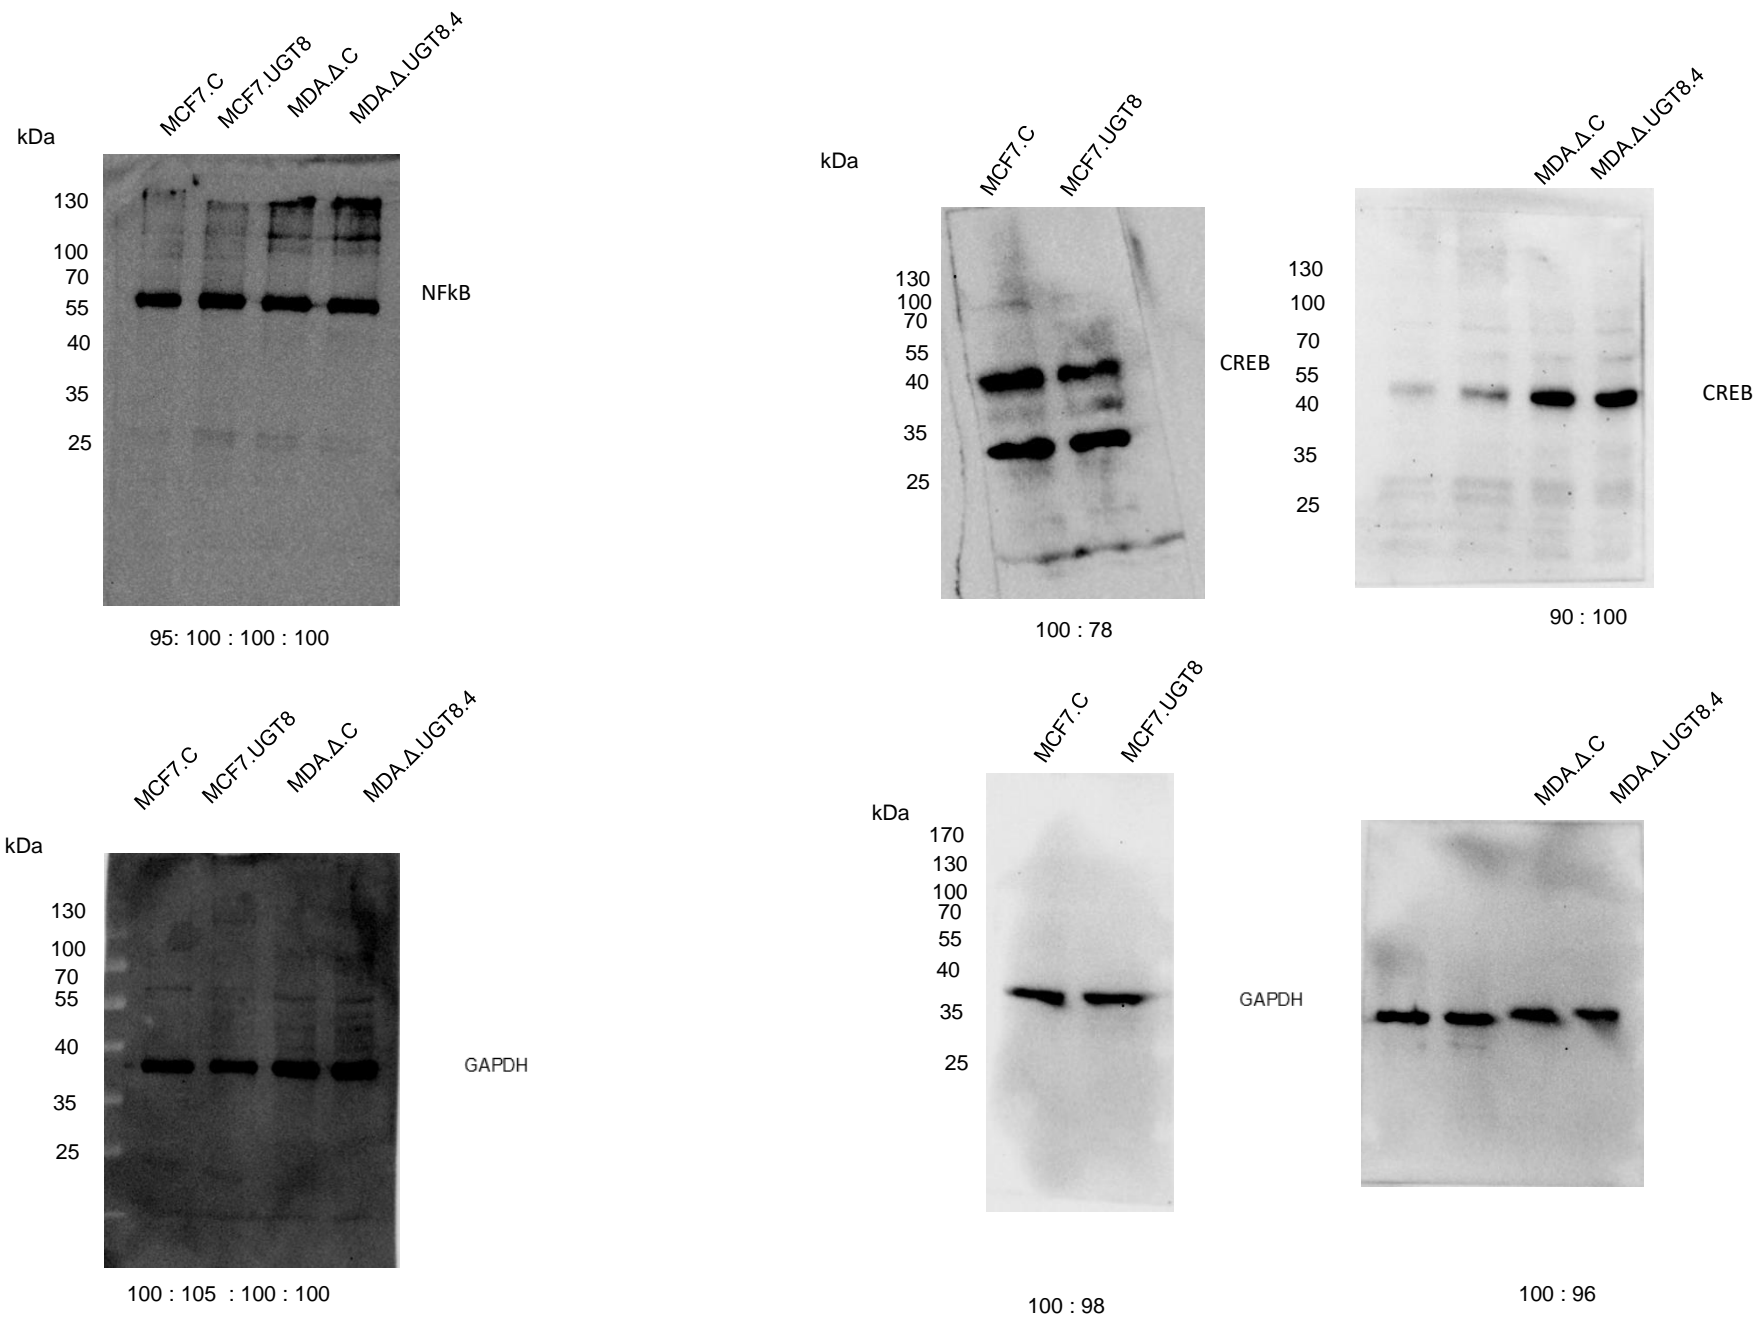

Supplement: s1 [file s1]
